# Supplementary material for: Induced currents due to 3D ground conductivity play a major role in the interpretation of geomagnetic variations
Source: Copernicus journal article supplement (doi:10.5194/angeo-38-983-2020), 2020-09-15
Supplement: Supplementary file 1 [file angeo-38-983-2020-supplement.zip]

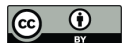

## *Supplement of*

# **Induced currents due to 3D ground conductivity play a major role in the interpretation of geomagnetic variations**

**Liisa Juusola et al.**

*Correspondence to:* Liisa Juusola ([liisa.juusola@fmi.fi](mailto:liisa.juusola@fmi.fi))

- [angeo-38-983-2020-supplement-title-page.pdf](#)
- [IMAGE\\_20180318T210000\\_10sec\\_20180318T220000.mp4](#)
- [supplementary\\_dBdt.pdf](#)

The copyright of individual parts of the supplement might differ from the CC BY 4.0 License.
