# Supplementary material for: Induced currents due to 3D ground conductivity play a major role in the interpretation of geomagnetic variations
Source: Copernicus journal article supplement (doi:10.5194/angeo-38-983-2020), 2020-09-15
Supplement: Supplementary file 2 [file angeo-38-983-2020-supplement.zip]

# **Supplementary material for “Induced telluric currents play a major role in the interpretation of geomagnetic variations”**

Liisa Juusola<sup>1</sup>, Ari Viljanen<sup>1</sup>, Heikki Vanhamäki<sup>2</sup>, and Maxim Smirnov<sup>3</sup>

<sup>1</sup>Finnish Meteorological Institute, Helsinki, Finland

<sup>2</sup>University of Oulu, Oulu, Finland

<sup>3</sup>Luleå University of Technology, Sweden

**Correspondence:** L. Juusola (liisa.juusola@fmi.fi)

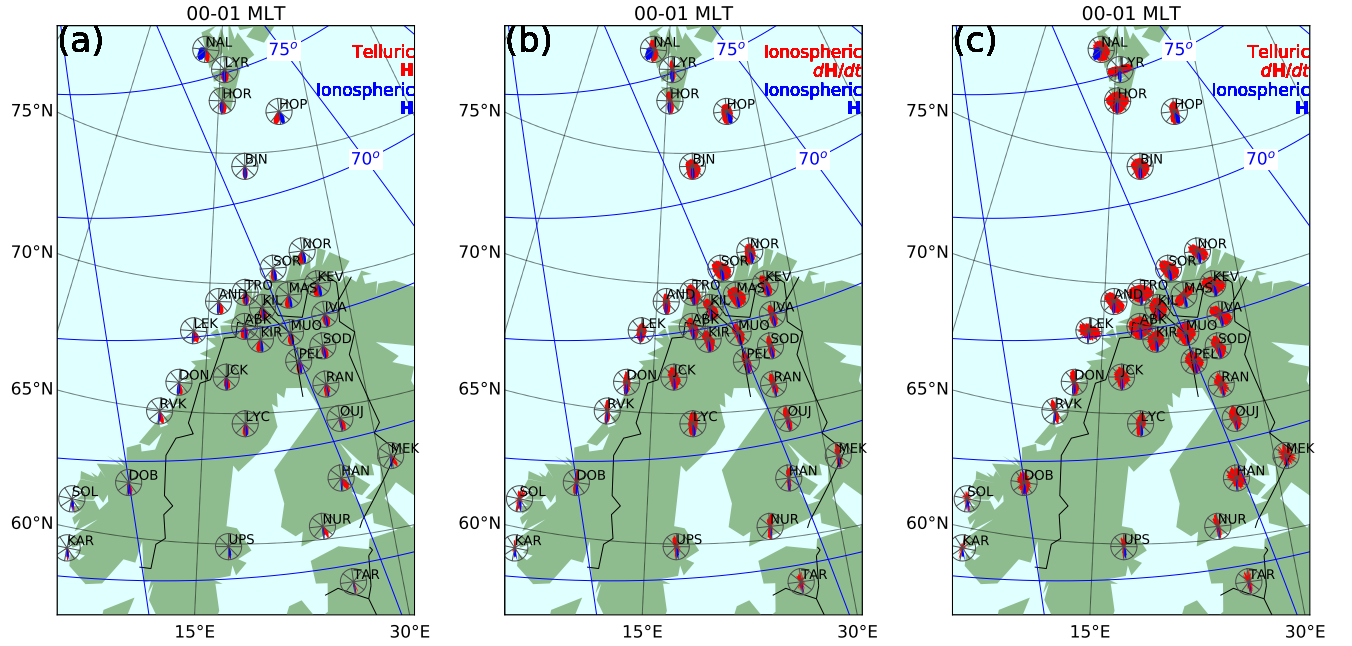

**Figure 1.** Histograms of the direction of the ionospheric (blue) and telluric (red) horizontal ground magnetic field ( $H$ ) with the amplitude of the time derivative of the horizontal magnetic field  $dH/dt > 1 \text{ nTs}^{-1}$  and the magnetic local time restricted to  $00 \leq \text{MLT} < 01 \text{ h}$  for IMAGE stations with sufficient amounts of good data available in 1994–2018 (a). The number of such data points is given in Table 1. In (b) the telluric part of the horizontal magnetic field has been replaced by the time derivative ( $dH/dt$ ) of the ionospheric part of the ground magnetic field and in (c) with the time derivative of the telluric part of the ground magnetic field.

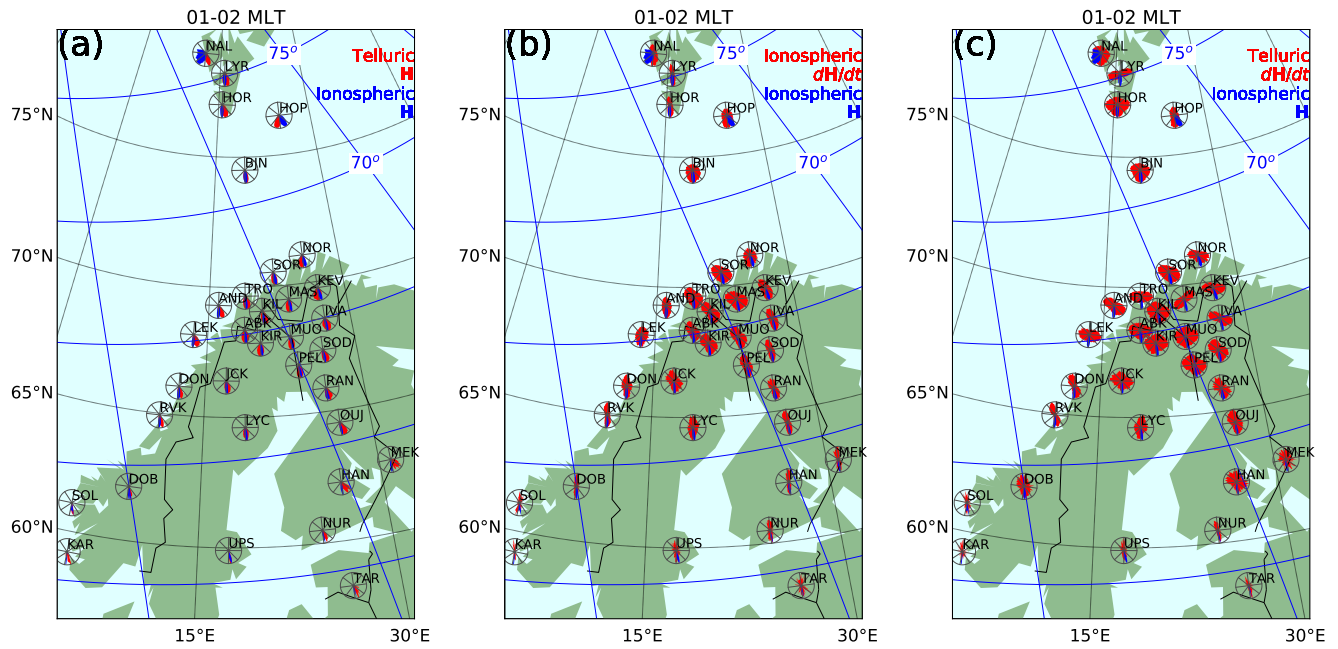

**Figure 2.** The same as Figure 1 except for  $01 \leq \text{MLT} < 02$ .

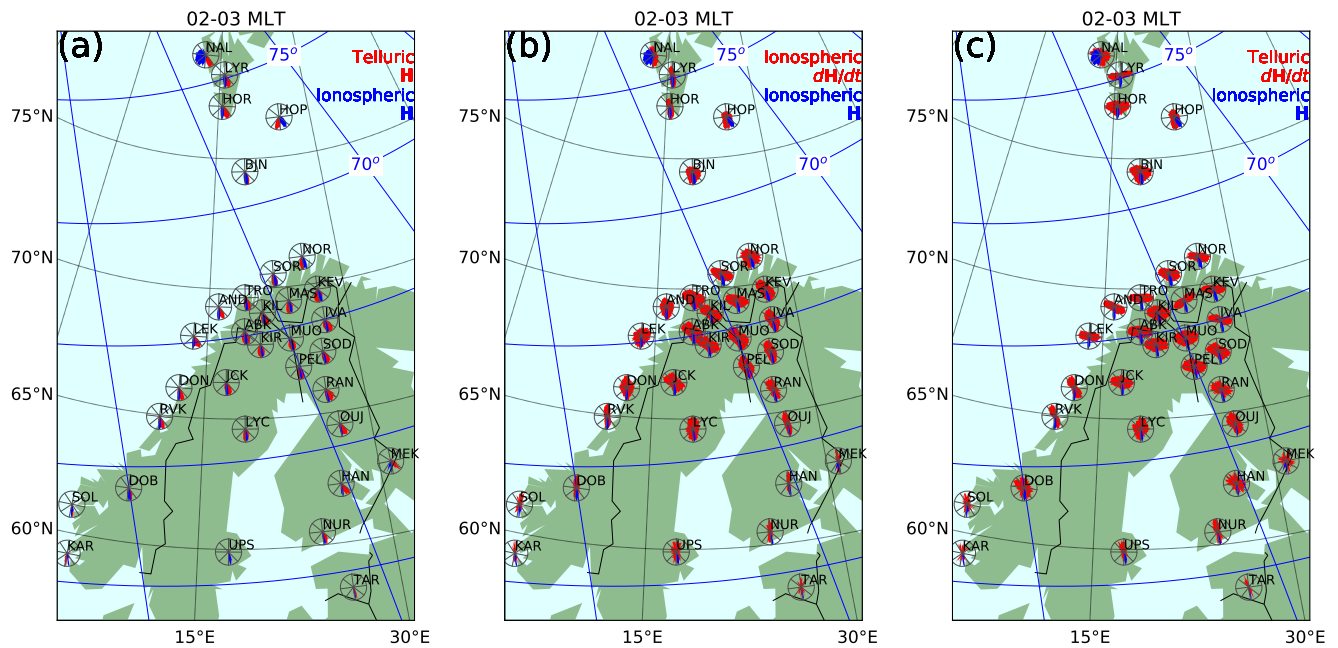

**Figure 3.** The same as Figure 1 except for  $02 \leq \text{MLT} < 03$ .

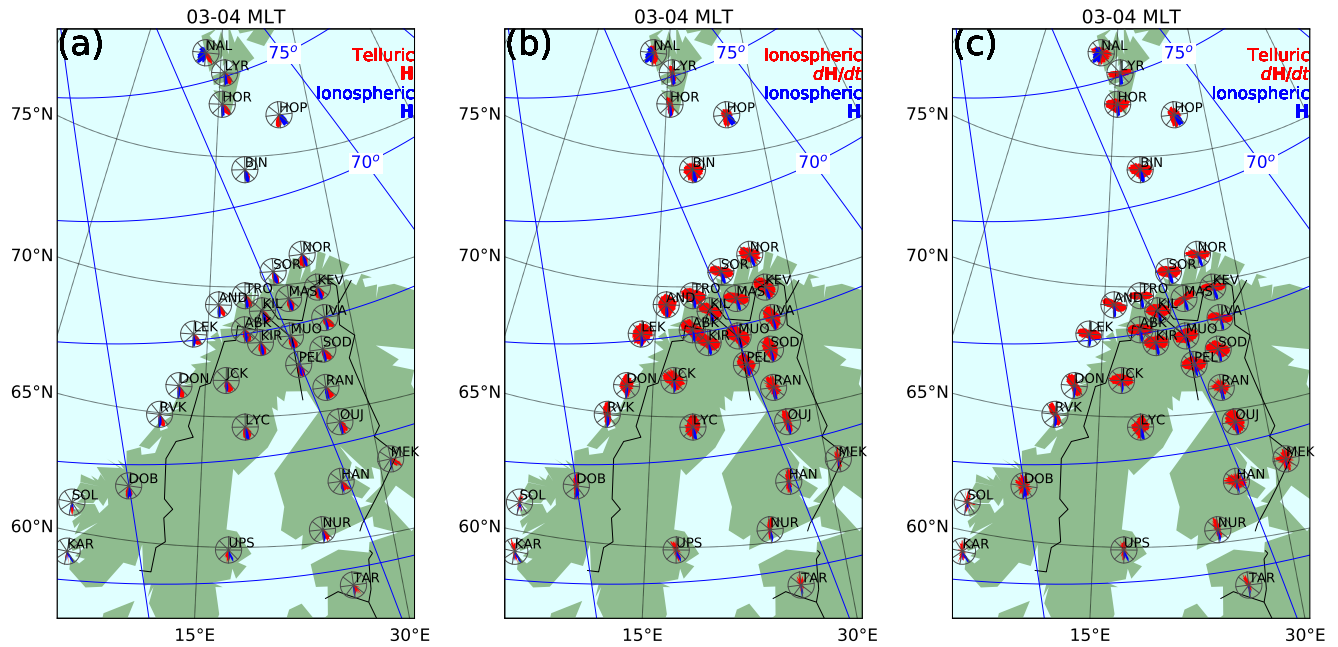

**Figure 4.** The same as Figure 1 except for  $03 \leq \text{MLT} < 04$ .



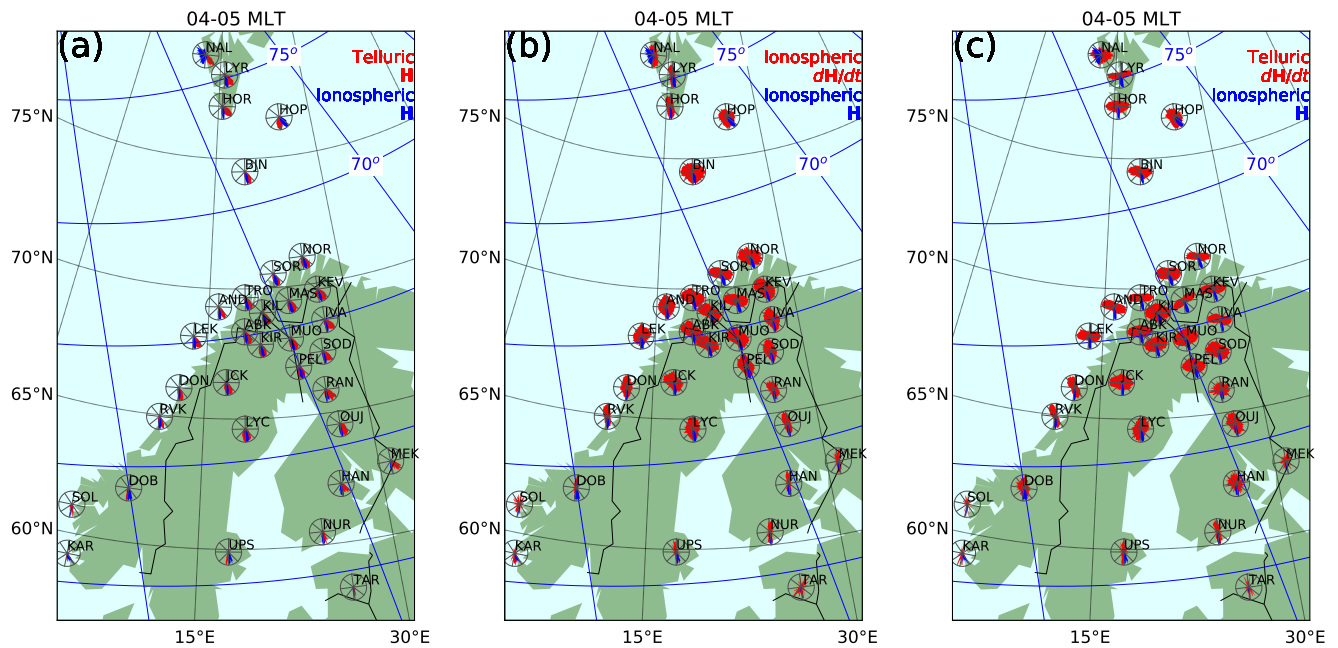

**Figure 5.** The same as Figure 1 except for  $04 \leq \text{MLT} < 05$ .

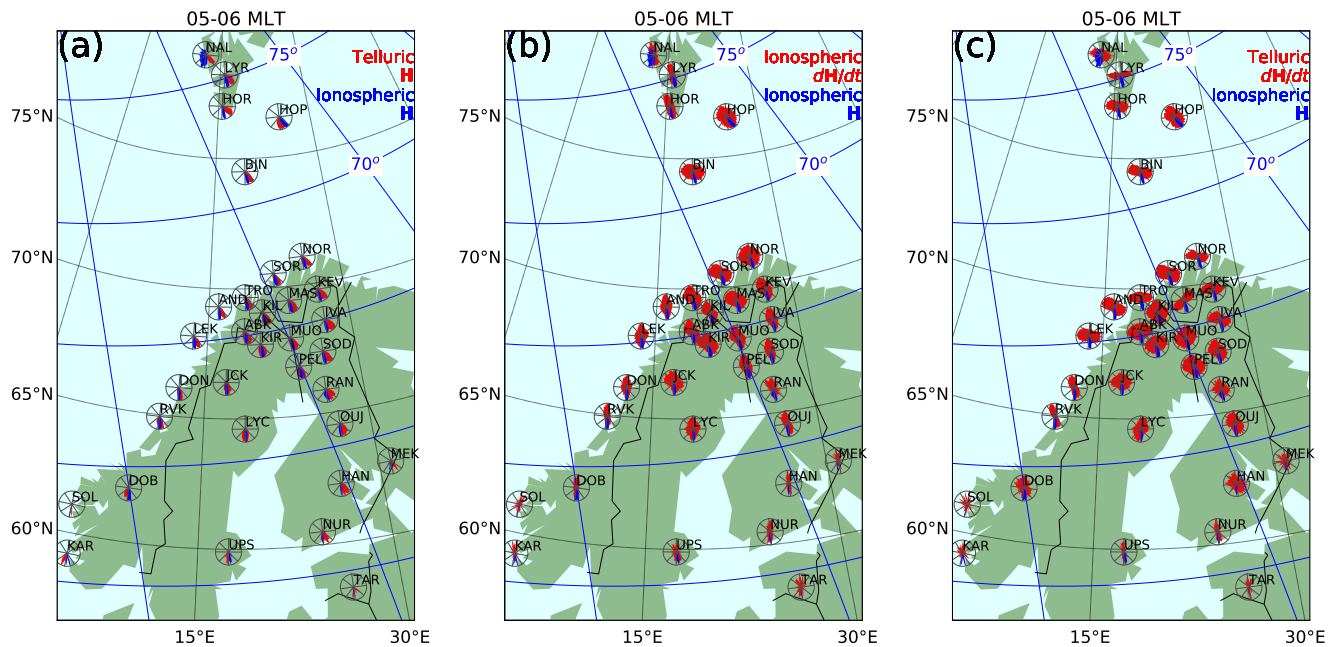

**Figure 6.** The same as Figure 1 except for  $05 \leq \text{MLT} < 06$ .

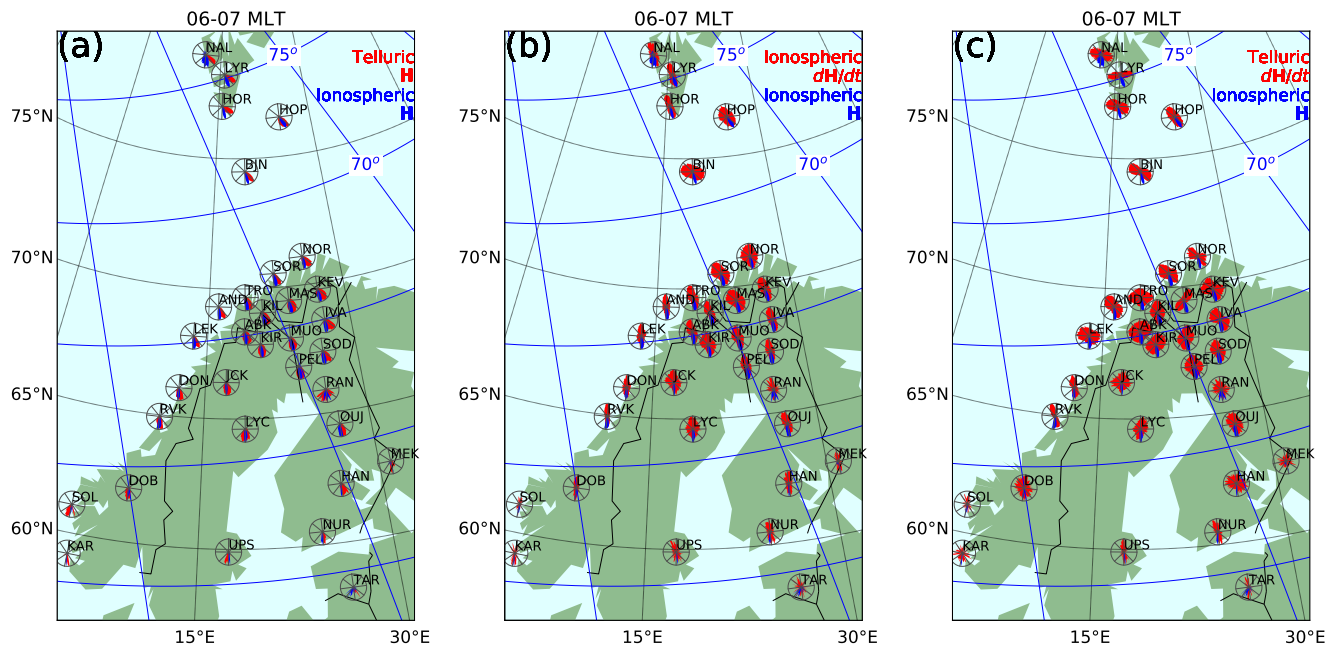

**Figure 7.** The same as Figure 1 except for  $06 \leq \text{MLT} < 07$ .

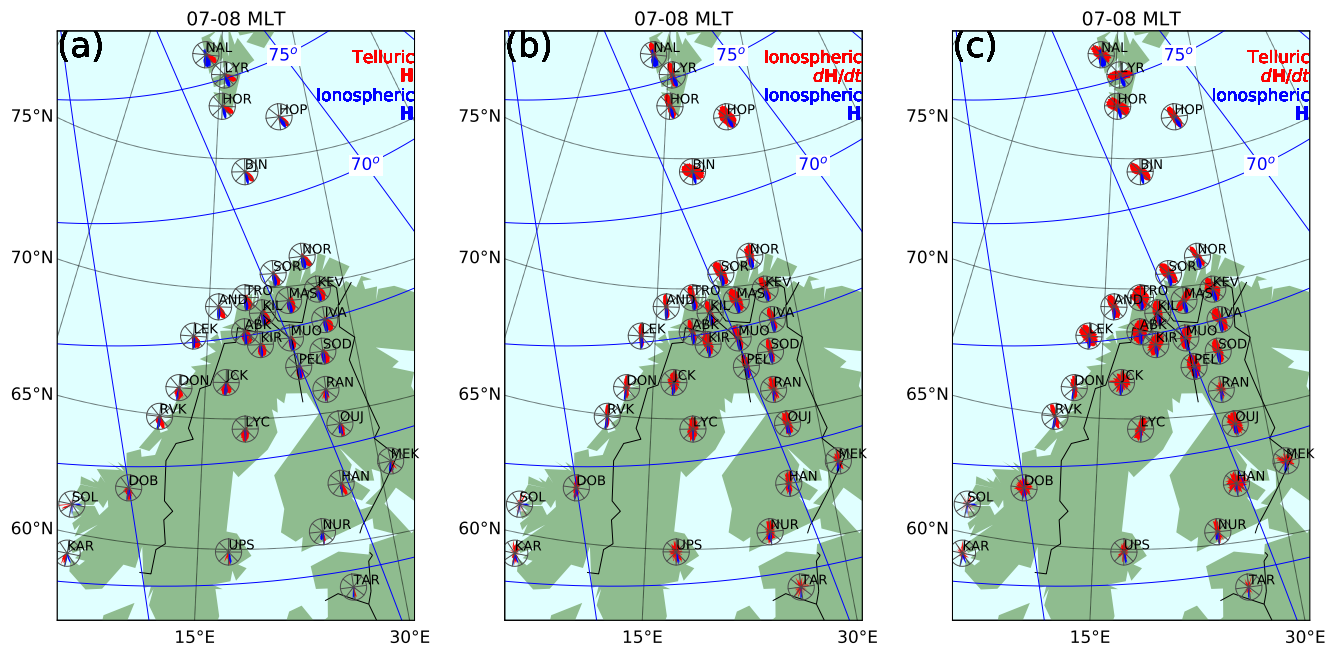

**Figure 8.** The same as Figure 1 except for  $07 \leq \text{MLT} < 08$ .

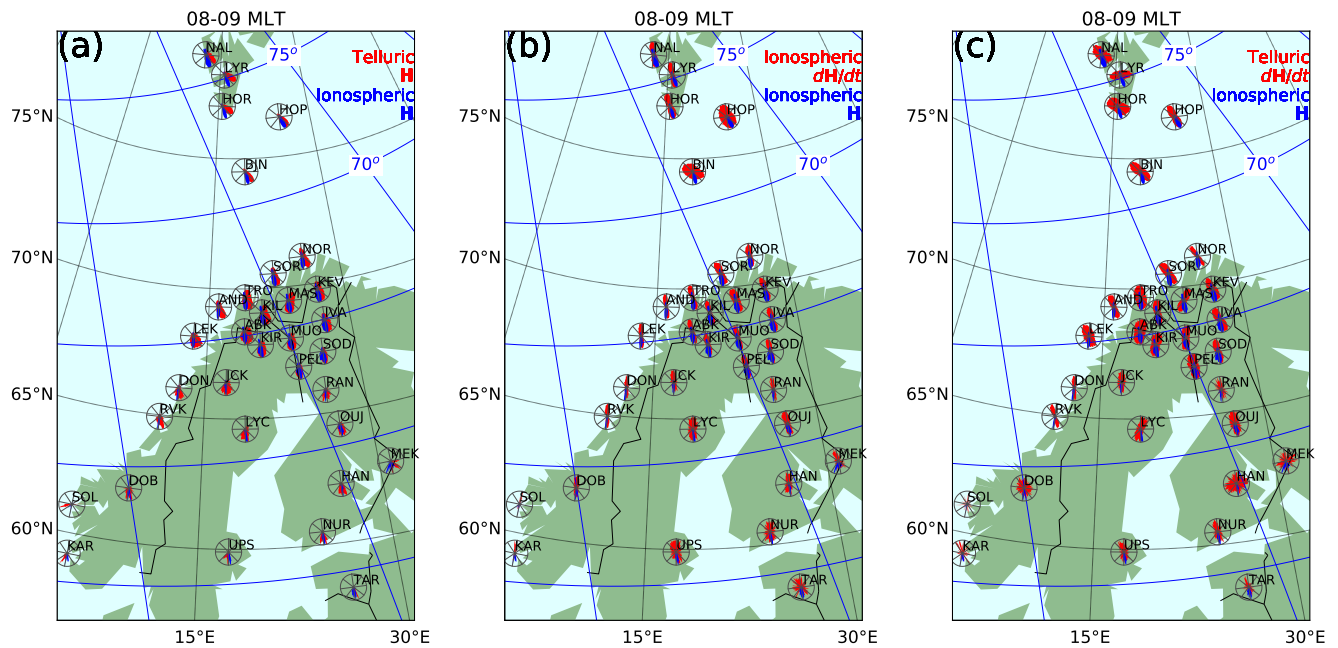

**Figure 9.** The same as Figure 1 except for  $08 \leq \text{MLT} < 09$ .

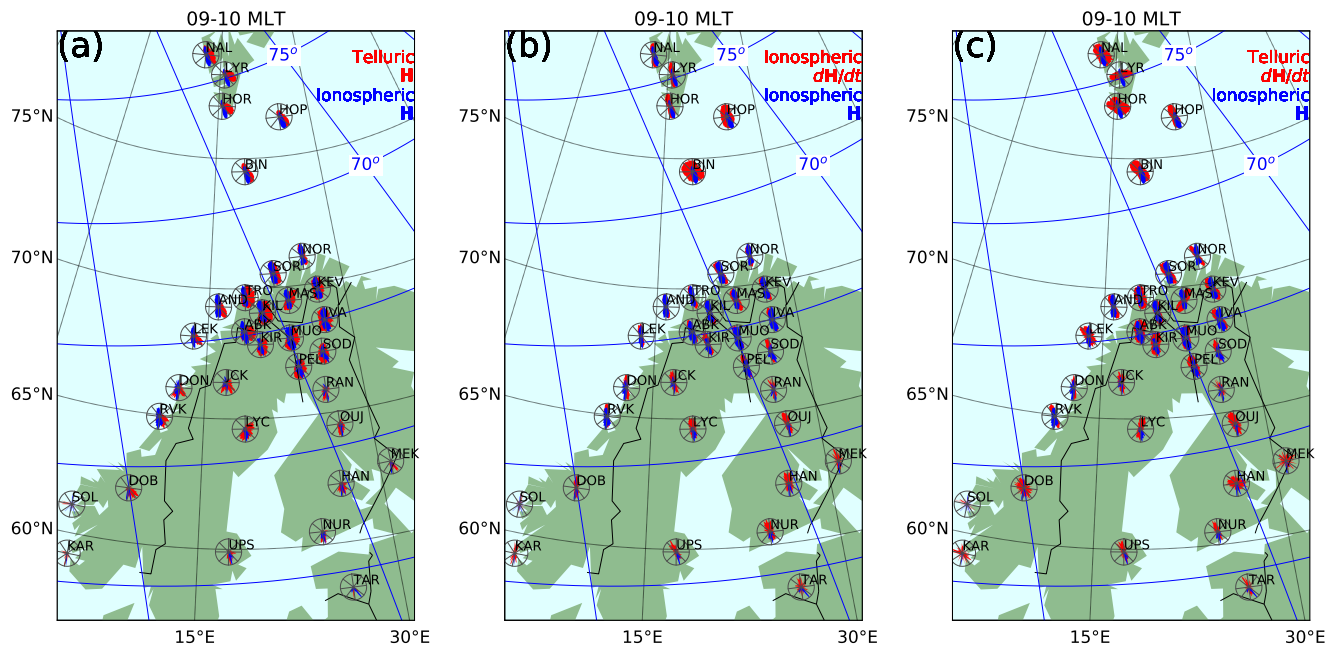

**Figure 10.** The same as Figure 1 except for  $09 \leq \text{MLT} < 10$ .

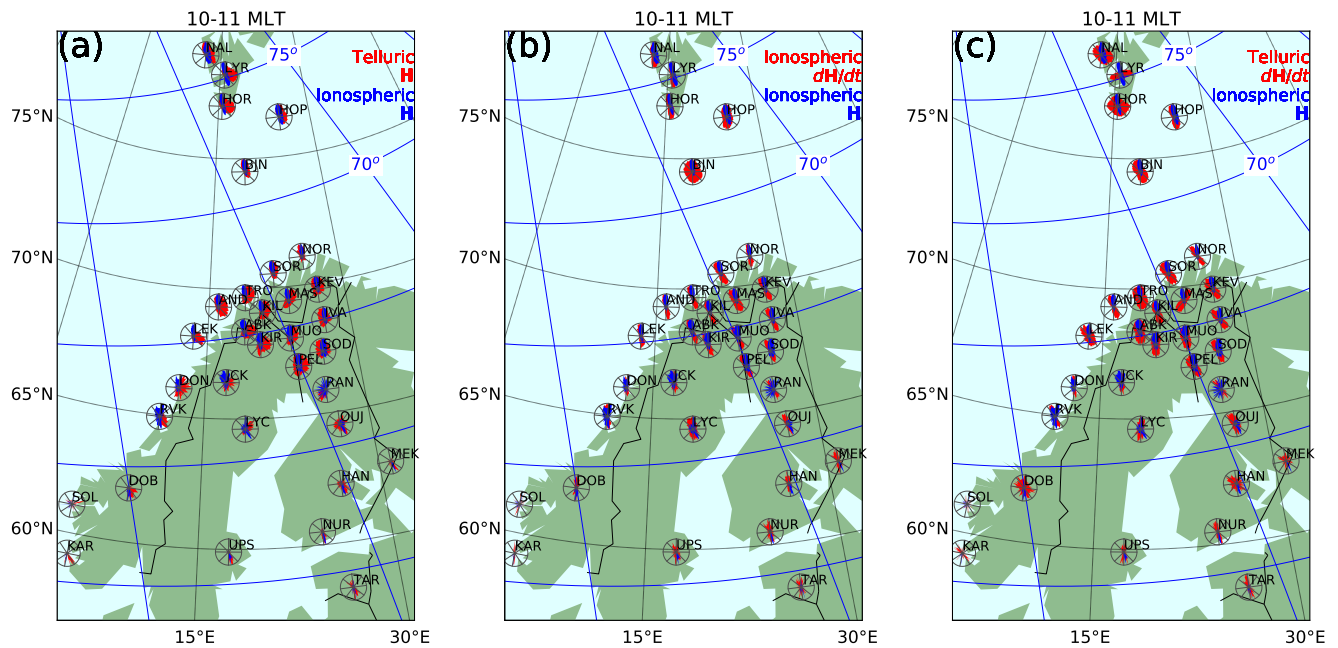

**Figure 11.** The same as Figure 1 except for  $10 \leq \text{MLT} < 11$ .

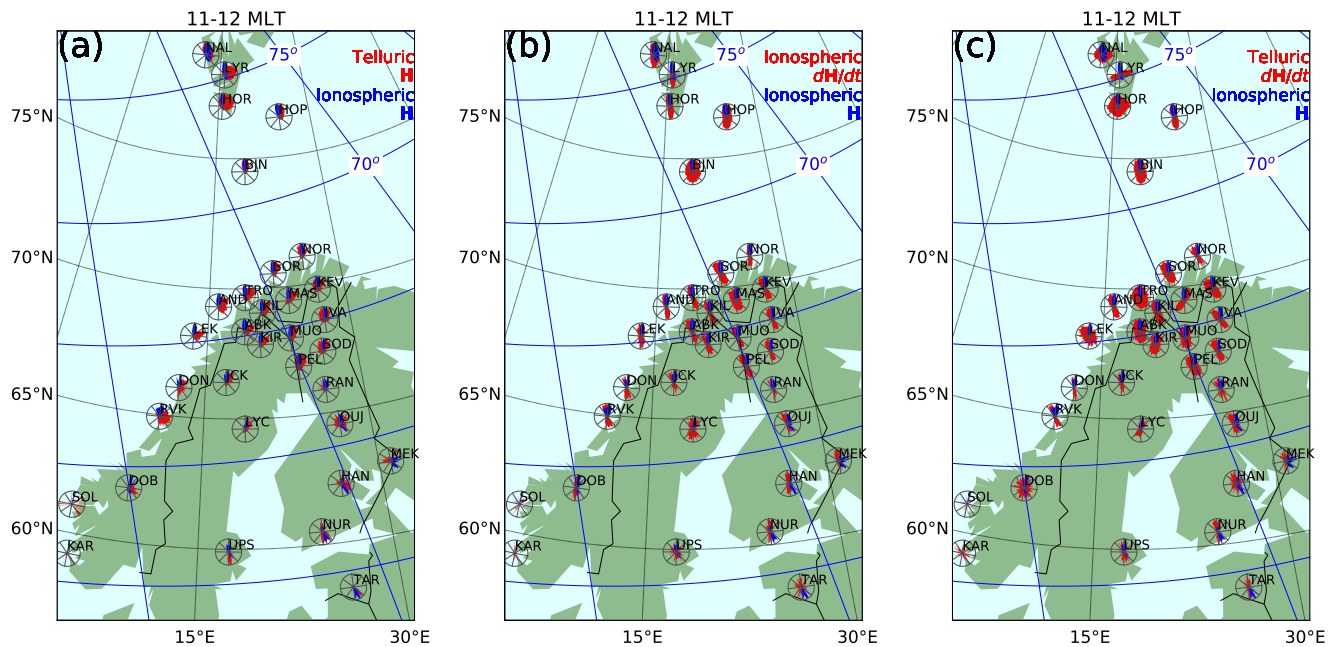

**Figure 12.** The same as Figure 1 except for  $11 \leq \text{MLT} < 12$ .

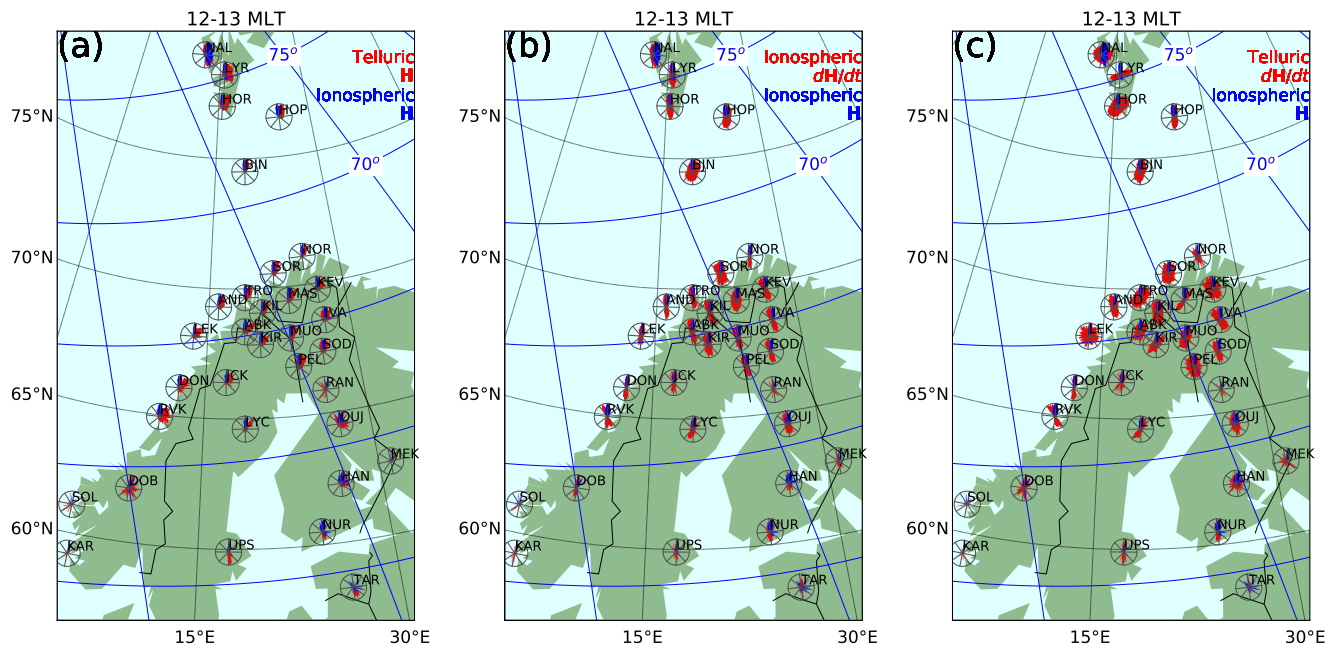

**Figure 13.** The same as Figure 1 except for  $12 \leq \text{MLT} < 13$ .

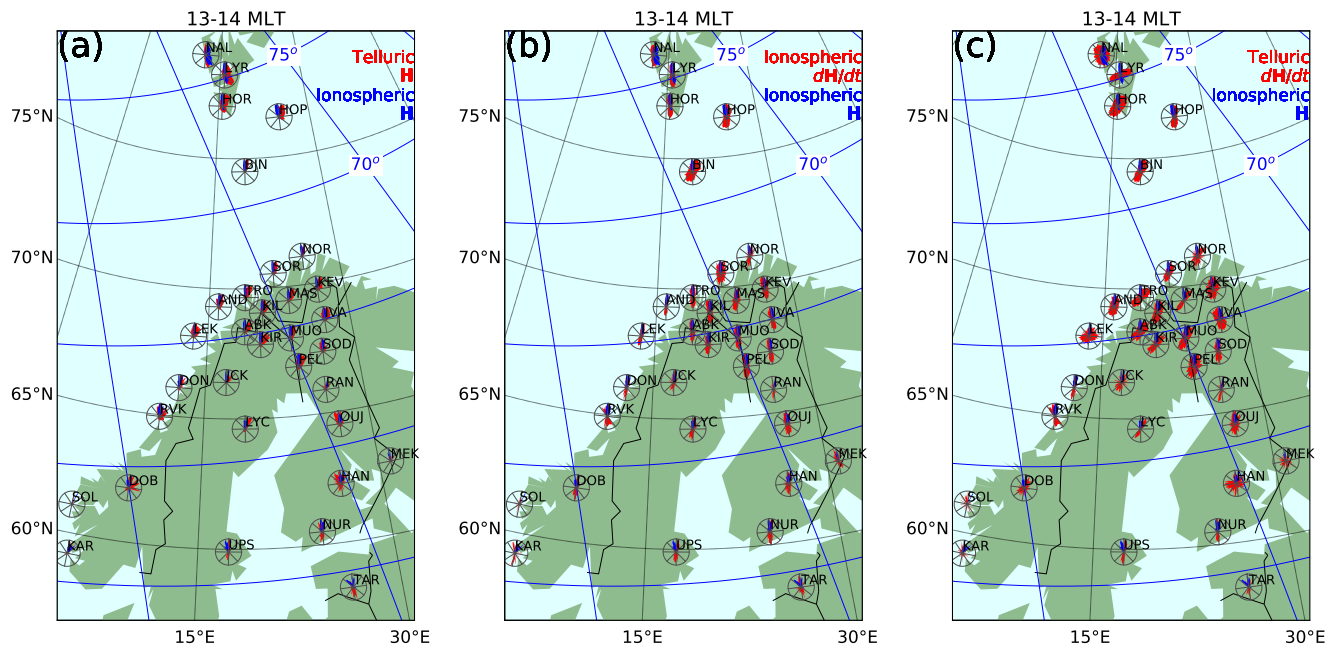

**Figure 14.** The same as Figure 1 except for  $13 \leq \text{MLT} < 14$ .



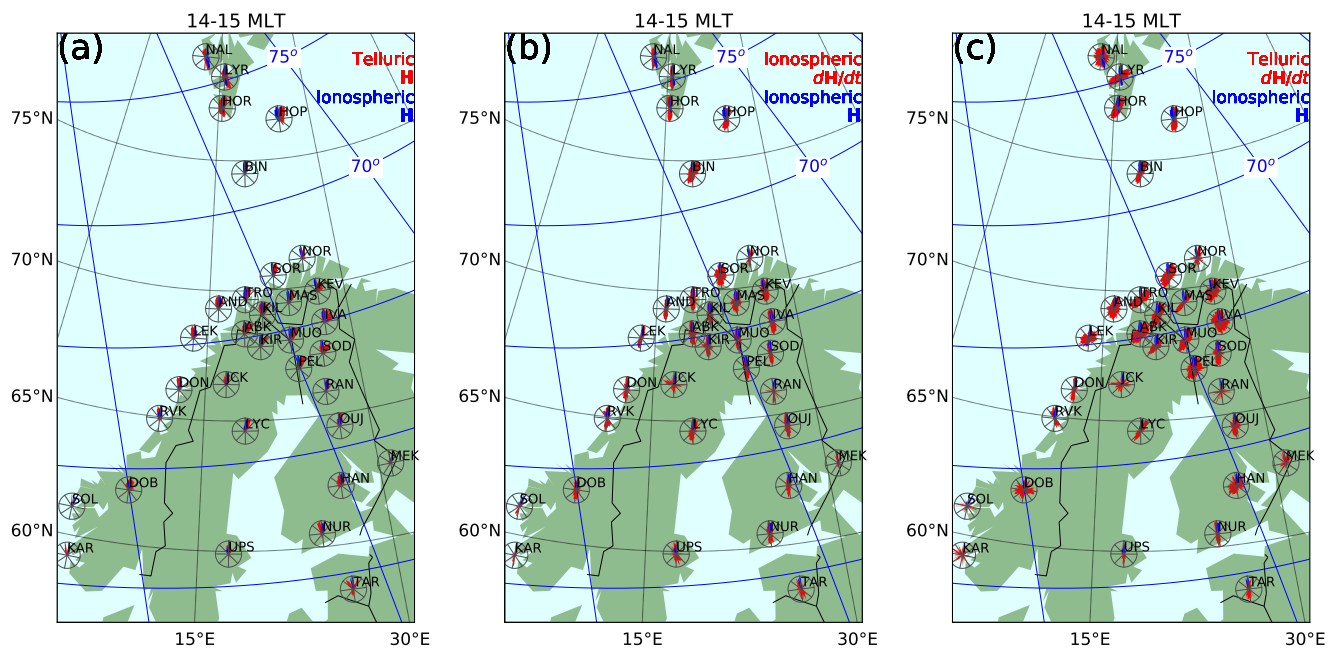

**Figure 15.** The same as Figure 1 except for  $14 \leq \text{MLT} < 15$ .

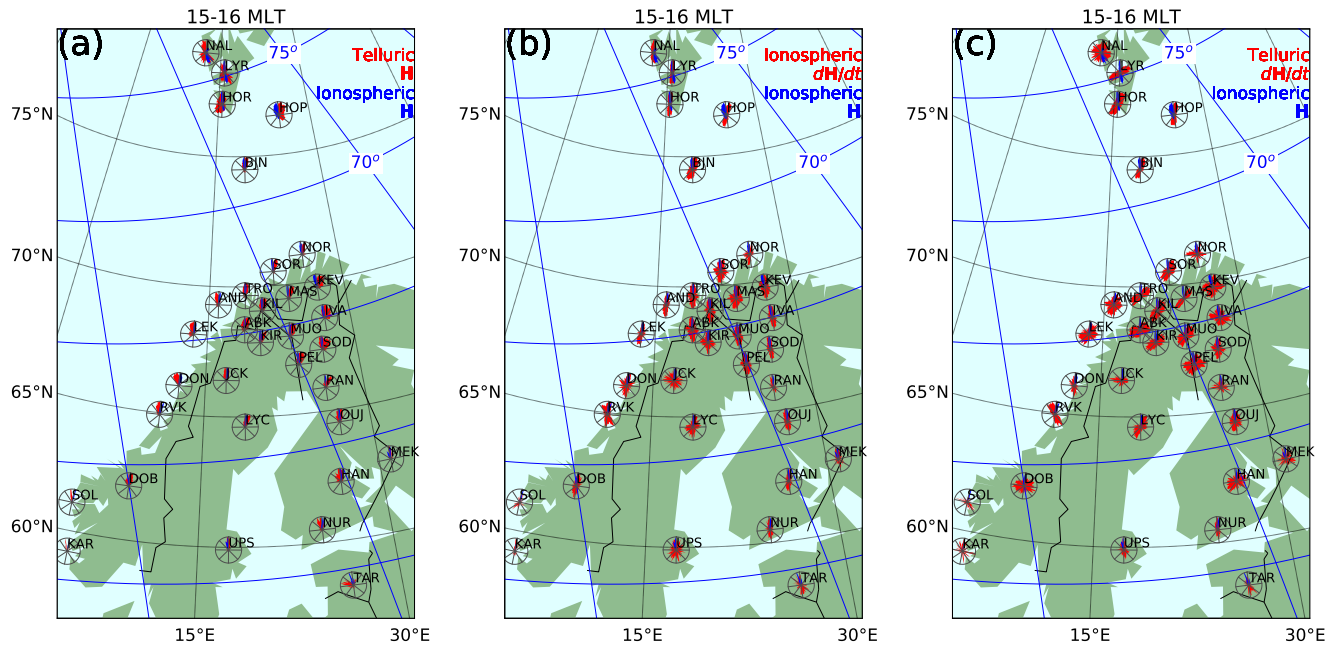

**Figure 16.** The same as Figure 1 except for  $15 \leq \text{MLT} < 16$ .

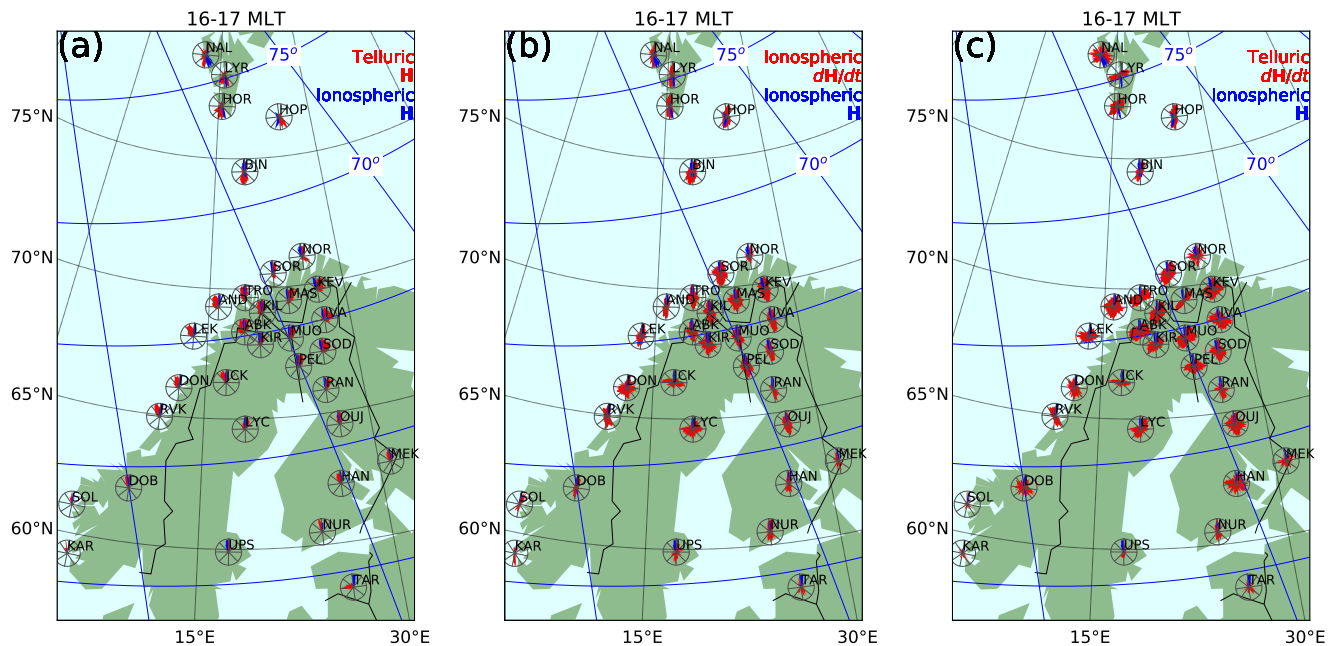

**Figure 17.** The same as Figure 1 except for  $16 \leq \text{MLT} < 17$ .

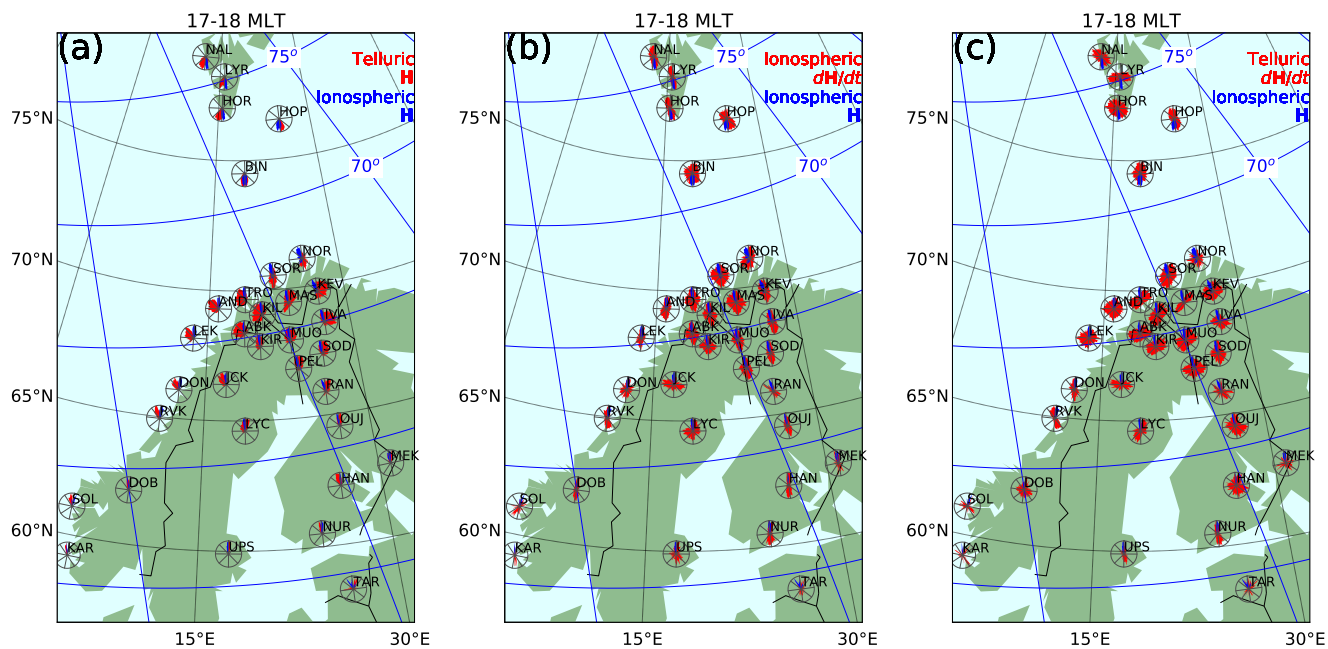

**Figure 18.** The same as Figure 1 except for  $17 \leq \text{MLT} < 18$ .

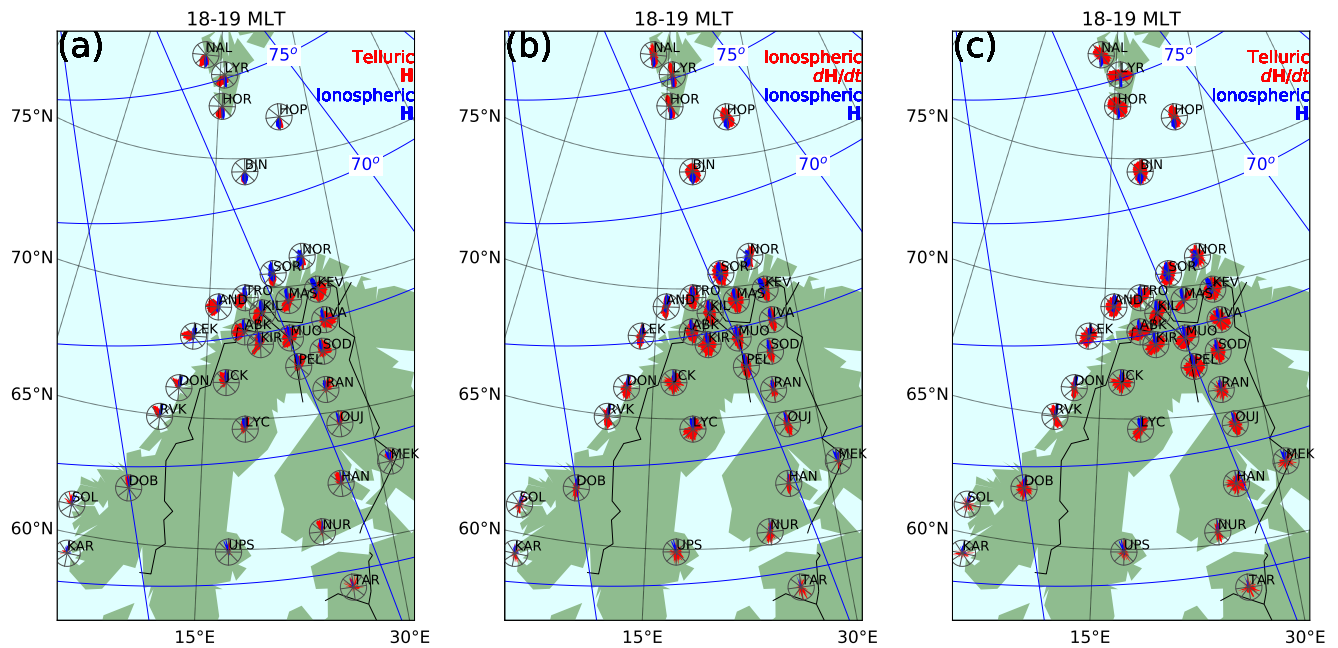

**Figure 19.** The same as Figure 1 except for  $18 \leq \text{MLT} < 19$ .

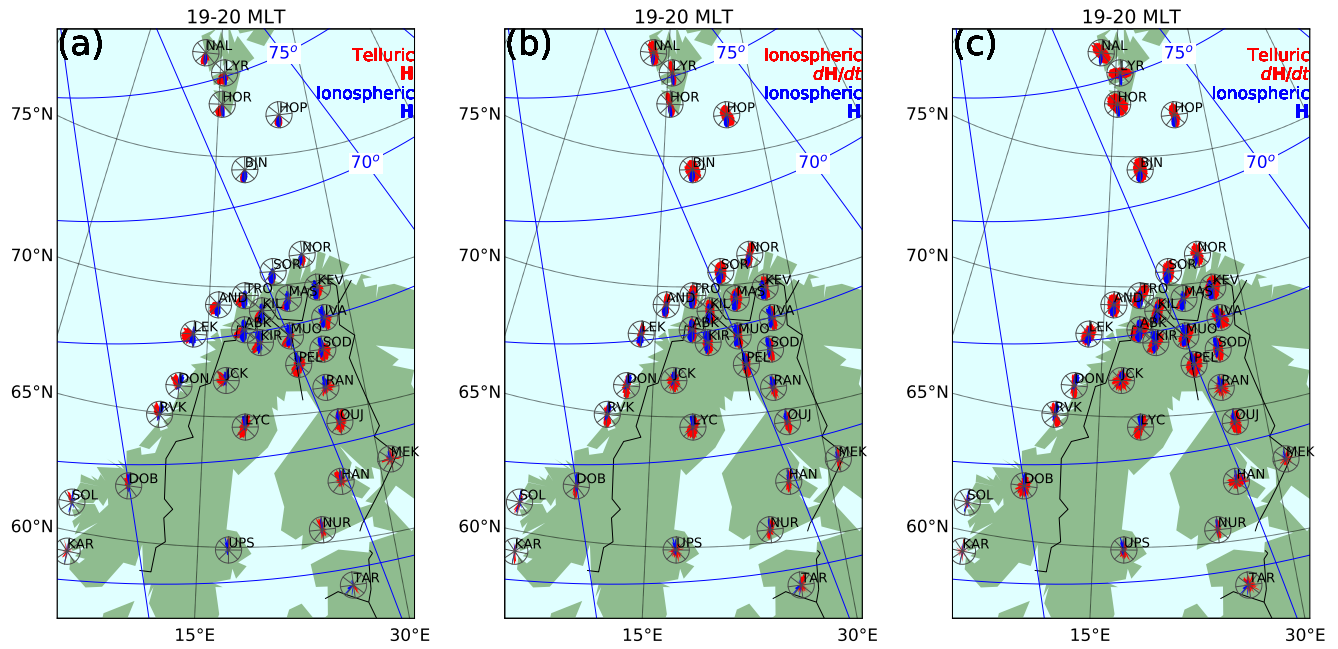

**Figure 20.** The same as Figure 1 except for  $19 \leq \text{MLT} < 20$ .



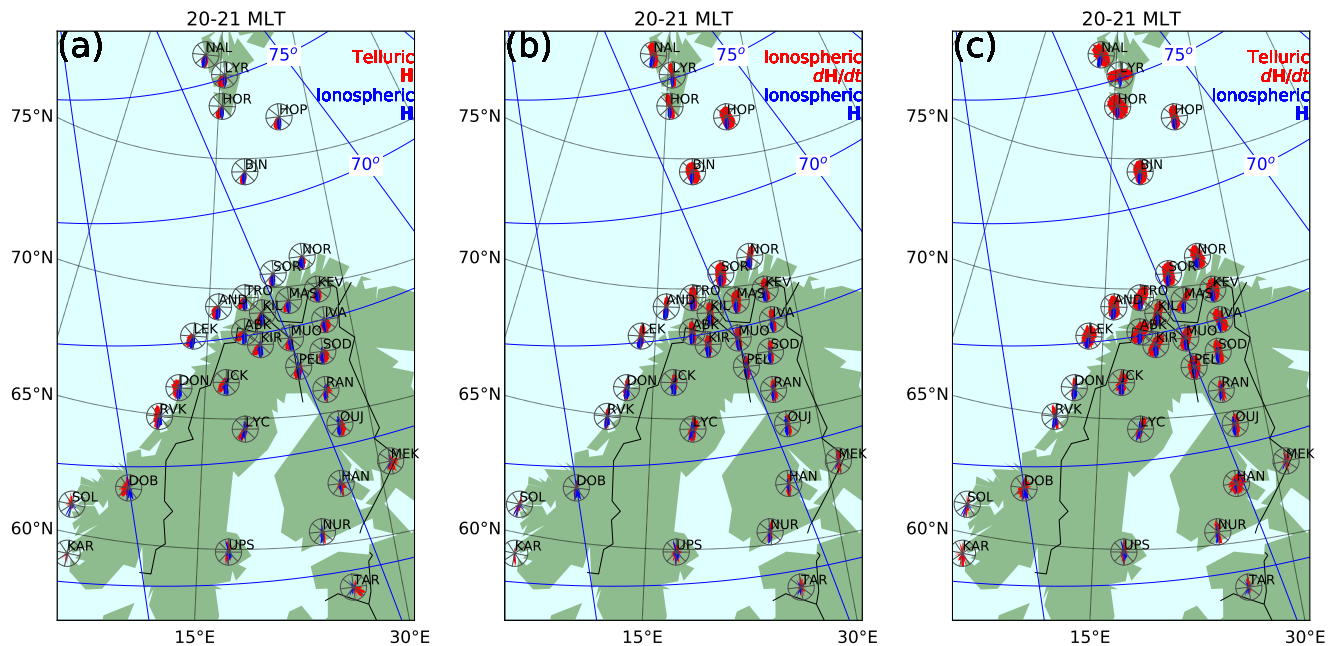

**Figure 21.** The same as Figure 1 except for  $20 \leq \text{MLT} < 21$ .

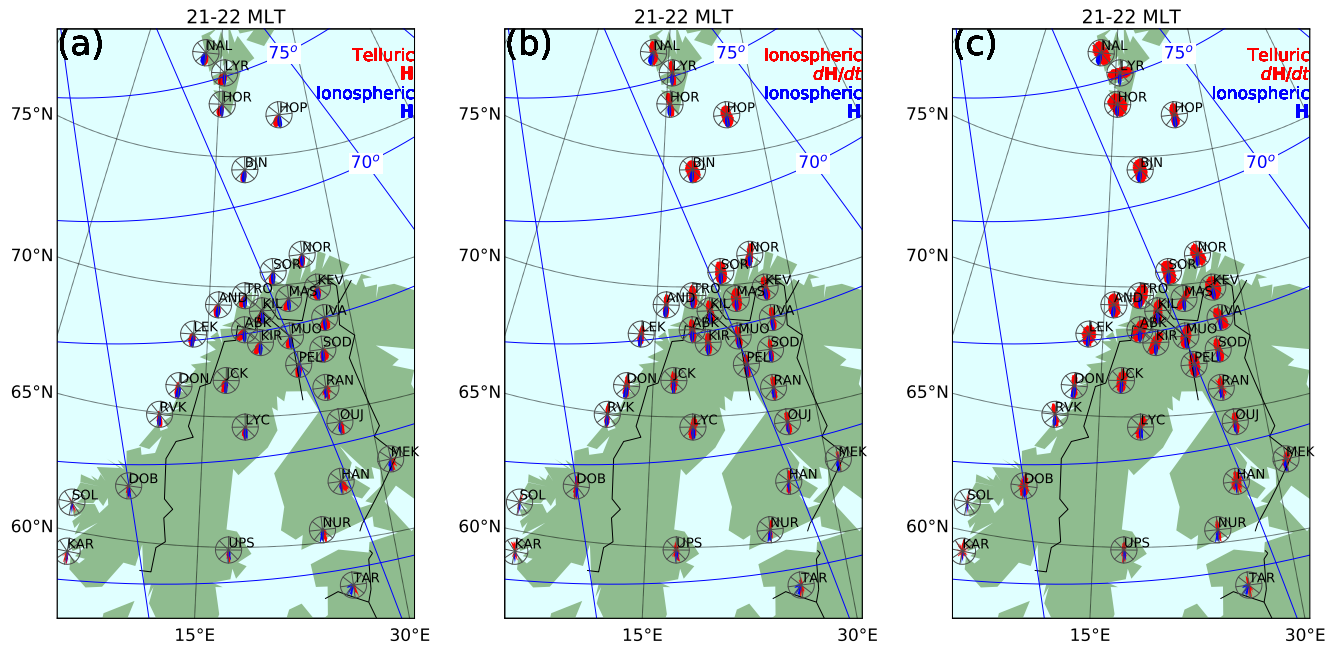

**Figure 22.** The same as Figure 1 except for  $21 \leq \text{MLT} < 22$ .

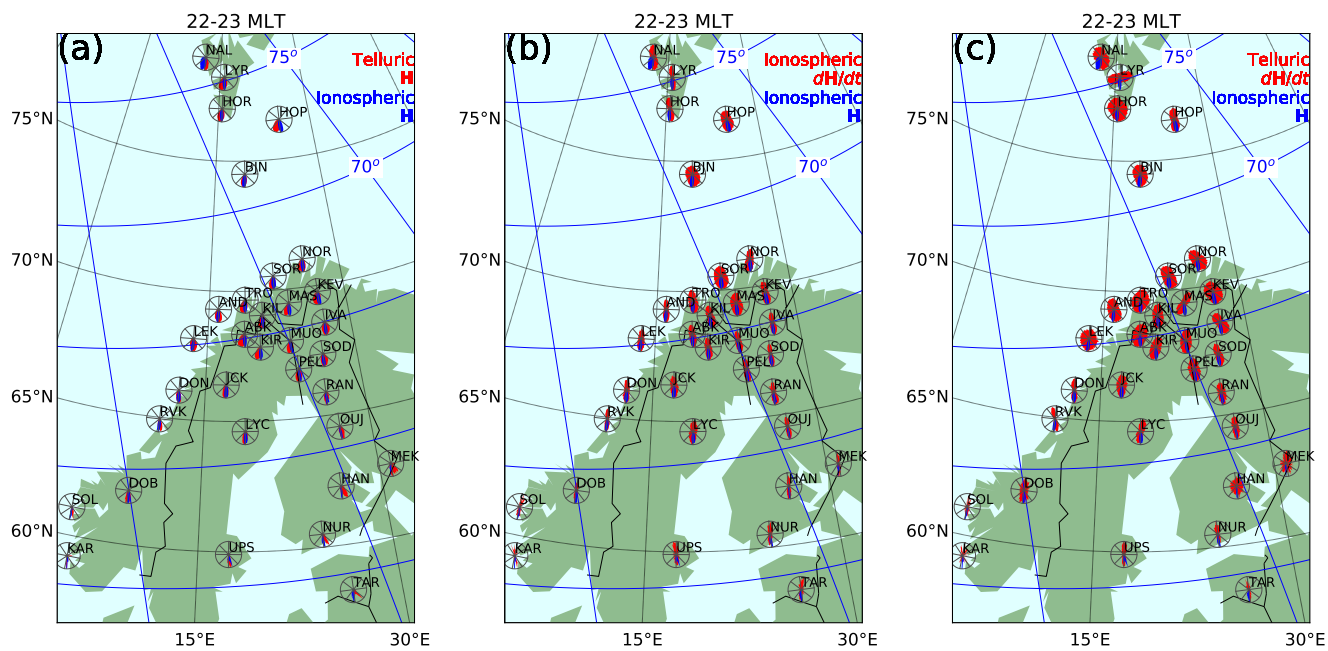

**Figure 23.** The same as Figure 1 except for  $22 \leq \text{MLT} < 23$ .

**Table 1.** IMAGE station and number of data points  $N$  with  $dH/dt > 1 \text{ nTs}^{-1}$  in 1994–2018, binned according to magnetic local time.

| Station | 00–01 | 01–02 | 02–03 | 03–04 | 04–05 | 05–06 | 06–07 | 07–08 | 08–09 | 09–10 | 10–11 | 11–12 | 12–13 | 13–14 | 14–15 | 15–16 | 16–17 | 17–18 | 18–19 | 19–20 | 20–21 | 21–22 | 22–23 | 23–24  |
|---------|-------|-------|-------|-------|-------|-------|-------|-------|-------|-------|-------|-------|-------|-------|-------|-------|-------|-------|-------|-------|-------|-------|-------|--------|
| NAL     | 22308 | 16561 | 11483 | 8624  | 6522  | 6663  | 6723  | 9078  | 14314 | 17693 | 19030 | 15340 | 13494 | 10863 | 6364  | 3319  | 1734  | 3413  | 8447  | 17260 | 22980 | 30106 | 30107 | 26709  |
| LYR     | 42311 | 28874 | 18629 | 15154 | 12488 | 12202 | 16149 | 25850 | 39686 | 45707 | 42020 | 32929 | 26811 | 20824 | 12707 | 7114  | 4169  | 6650  | 17064 | 31113 | 41392 | 52828 | 55675 | 50663  |
| HOR     | 65494 | 41950 | 26064 | 21537 | 19391 | 23247 | 33437 | 59775 | 84739 | 88321 | 75414 | 52818 | 36323 | 27131 | 17815 | 10362 | 5903  | 10596 | 24482 | 46525 | 62558 | 81697 | 88066 | 81753  |
| HOP     | 48026 | 30021 | 20359 | 16078 | 16320 | 22456 | 32459 | 47349 | 58613 | 60021 | 45609 | 30115 | 21014 | 14832 | 10954 | 7590  | 4699  | 9195  | 17449 | 32040 | 48852 | 61606 | 65976 | 63761  |
| B1N     | 71877 | 43486 | 26651 | 21957 | 24387 | 37198 | 56775 | 77176 | 77950 | 63937 | 49042 | 30275 | 17777 | 12446 | 8344  | 6600  | 6080  | 10132 | 20896 | 40847 | 60838 | 81879 | 94856 | 93441  |
| NOR     | 20059 | 15512 | 10884 | 10115 | 12767 | 16830 | 16952 | 13770 | 11875 | 8170  | 4738  | 2646  | 1271  | 889   | 760   | 1091  | 1455  | 2637  | 4262  | 8147  | 12825 | 21665 | 25844 | 25968  |
| SOR     | 63801 | 51678 | 41565 | 43892 | 55472 | 65281 | 66320 | 56977 | 47237 | 34809 | 24456 | 14236 | 9073  | 7066  | 6784  | 6630  | 8160  | 10996 | 17470 | 26519 | 41616 | 59394 | 70744 | 73021  |
| KEV     | 62654 | 51757 | 42576 | 44942 | 54682 | 56942 | 52474 | 41289 | 33735 | 26595 | 18457 | 11012 | 7353  | 5836  | 5414  | 5609  | 7061  | 10389 | 15747 | 23112 | 36544 | 53945 | 65103 | 68322  |
| TRO     | 93284 | 77720 | 67825 | 70562 | 81693 | 90572 | 87420 | 72188 | 58194 | 43421 | 30474 | 18980 | 12835 | 9712  | 9285  | 9368  | 12294 | 13897 | 23180 | 33333 | 53066 | 77217 | 97905 | 101142 |
| MAS     | 63796 | 55924 | 48754 | 50638 | 58240 | 58831 | 55926 | 45904 | 37380 | 28417 | 21354 | 13779 | 9711  | 8048  | 6589  | 7318  | 9120  | 10836 | 15351 | 22824 | 36274 | 53110 | 65016 | 67163  |
| AND     | 65309 | 52966 | 45122 | 48720 | 56901 | 61729 | 57322 | 45640 | 37089 | 26158 | 17837 | 10929 | 7885  | 6468  | 6416  | 5824  | 8834  | 10929 | 17049 | 24112 | 36872 | 53311 | 69746 | 71221  |
| KIL     | 74785 | 64129 | 55982 | 57140 | 64440 | 69109 | 65242 | 53620 | 43656 | 32949 | 22894 | 15065 | 10479 | 8355  | 7834  | 7968  | 10849 | 12811 | 19287 | 28398 | 42415 | 59046 | 76584 | 79453  |
| IYA     | 48154 | 44818 | 41257 | 42781 | 44330 | 41537 | 35093 | 28750 | 24057 | 18103 | 14193 | 9019  | 6416  | 5532  | 5231  | 4758  | 6707  | 8260  | 11239 | 17586 | 24214 | 34947 | 45738 | 51323  |
| ABK     | 64140 | 55489 | 49942 | 53090 | 56704 | 53825 | 49474 | 38282 | 31182 | 22849 | 16191 | 10634 | 8012  | 7197  | 7699  | 7498  | 10905 | 12793 | 18114 | 24474 | 34260 | 46759 | 63977 | 65709  |
| LEK     | 17915 | 16603 | 16985 | 19254 | 20802 | 21436 | 20064 | 15635 | 12062 | 9704  | 6074  | 4627  | 3437  | 3135  | 2934  | 2804  | 3712  | 4585  | 5951  | 8591  | 10128 | 13695 | 17643 | 18222  |
| MUO     | 48203 | 46410 | 43545 | 46713 | 49466 | 47076 | 40754 | 32795 | 25995 | 20693 | 15541 | 10395 | 7622  | 6583  | 6454  | 6266  | 8615  | 10340 | 13786 | 20094 | 27902 | 35414 | 47151 | 48442  |
| KIR     | 35695 | 32874 | 30491 | 31435 | 32788 | 27550 | 23437 | 15953 | 11614 | 8386  | 5586  | 3327  | 2648  | 2807  | 3125  | 3338  | 4089  | 6096  | 8384  | 11247 | 15726 | 22023 | 30866 | 33331  |
| SOD     | 44513 | 42650 | 39613 | 41934 | 40131 | 35012 | 27629 | 20858 | 16147 | 12138 | 9367  | 6004  | 4610  | 4250  | 4743  | 4668  | 6140  | 8564  | 11192 | 15302 | 21362 | 28484 | 37787 | 41984  |
| PEL     | 54663 | 52724 | 50238 | 50352 | 47768 | 40416 | 32928 | 25396 | 20790 | 16993 | 12973 | 9228  | 6960  | 5890  | 6805  | 6957  | 8898  | 11245 | 13946 | 19700 | 25549 | 34565 | 45480 | 49276  |
| JCK     | 13120 | 13132 | 12132 | 11630 | 11569 | 9156  | 6908  | 4423  | 3437  | 1908  | 1426  | 700   | 495   | 589   | 786   | 1246  | 1893  | 2347  | 3612  | 3633  | 5573  | 8233  | 11514 | 12172  |
| DOH     | 18964 | 17184 | 17278 | 15021 | 13136 | 10369 | 7511  | 5338  | 4034  | 2741  | 1726  | 1270  | 981   | 879   | 1114  | 1845  | 2434  | 2505  | 3905  | 4486  | 6716  | 10329 | 14336 | 16713  |
| RAN     | 4664  | 4443  | 3749  | 3906  | 3639  | 2377  | 1568  | 1223  | 769   | 488   | 537   | 329   | 116   | 170   | 214   | 572   | 955   | 802   | 1318  | 1818  | 2485  | 2440  | 3972  | 4246   |
| RVK     | 26455 | 24277 | 23914 | 23335 | 21101 | 18105 | 14627 | 10855 | 9205  | 7533  | 5369  | 4686  | 3820  | 4137  | 4179  | 4962  | 6271  | 6709  | 8329  | 9984  | 12271 | 15847 | 19218 | 23567  |
| LYC     | 15863 | 15067 | 14195 | 14524 | 12789 | 11178 | 9007  | 6270  | 5146  | 3599  | 2324  | 1774  | 1706  | 1734  | 2268  | 2532  | 3946  | 4209  | 6191  | 6869  | 7339  | 10167 | 12655 | 14848  |
| OUJ     | 19538 | 19562 | 16777 | 15615 | 13579 | 11698 | 10083 | 6833  | 5542  | 5023  | 3934  | 2887  | 2605  | 2730  | 3437  | 3887  | 5462  | 6072  | 7141  | 9046  | 10275 | 11005 | 14841 | 16107  |
| MEK     | 2011  | 1794  | 1479  | 1480  | 927   | 707   | 874   | 722   | 638   | 655   | 582   | 478   | 291   | 322   | 310   | 560   | 745   | 758   | 706   | 891   | 779   | 1039  | 1223  | 1315   |
| HAN     | 5672  | 4880  | 4386  | 4199  | 2900  | 3496  | 3333  | 2724  | 2375  | 2572  | 1878  | 1485  | 1507  | 1333  | 1766  | 2328  | 2866  | 3256  | 2740  | 3191  | 3687  | 3024  | 4130  | 4119   |
| DOB     | 5471  | 4898  | 4786  | 4150  | 4342  | 4144  | 3028  | 2688  | 2756  | 2140  | 1421  | 1395  | 1064  | 1302  | 1547  | 1948  | 2370  | 2330  | 2746  | 3773  | 2957  | 3614  | 3363  | 5031   |
| SOL     | 940   | 832   | 943   | 431   | 381   | 522   | 384   | 64    | 82    | 59    | 43    | 19    | 42    | 92    | 231   | 236   | 295   | 366   | 522   | 425   | 335   | 296   | 559   | 532    |
| NUR     | 3305  | 3024  | 2687  | 2262  | 1474  | 1949  | 2117  | 1995  | 2160  | 2131  | 1525  | 1220  | 1351  | 1346  | 1701  | 2039  | 2152  | 2167  | 1887  | 2129  | 2609  | 2047  | 2829  | 2800   |
| UPS     | 2003  | 1584  | 1792  | 936   | 1099  | 1232  | 1223  | 1155  | 1518  | 1348  | 650   | 653   | 635   | 747   | 1131  | 1342  | 956   | 969   | 1128  | 1321  | 1258  | 1573  | 1627  | 1725   |
| KAR     | 401   | 435   | 336   | 381   | 385   | 585   | 413   | 406   | 313   | 350   | 148   | 77    | 106   | 169   | 271   | 250   | 226   | 227   | 377   | 184   | 219   | 362   | 229   | 336    |
| TAR     | 590   | 569   | 472   | 574   | 305   | 466   | 304   | 298   | 693   | 557   | 381   | 308   | 347   | 586   | 623   | 639   | 441   | 313   | 439   | 529   | 522   | 562   | 1137  | 785    |
