# Supplementary material for: Induced currents due to 3D ground conductivity play a major role in the interpretation of geomagnetic variations
Source: Copernicus journal article supplement (doi:10.5194/angeo-38-983-2020), 2020-09-15
Supplement: Supplementary file 3 [file angeo-38-983-2020-supplement.zip]

Archive with 3 entries (3 files):
- IMAGE_20180318T210000_10sec_20180318T220000.mp4
- supplementary_dBdt.pdf
- angeo-38-983-2020-supplement-title-page.pdf
